# Supplementary material
Source: bioRxiv or medRxiv preprint supplement (https://www.biorxiv.org/highwire/filestream/93175/field_highwire_adjunct_files/0/295808-1.pdf)
Supplement: Supplementary file [file 295808-1.pdf]

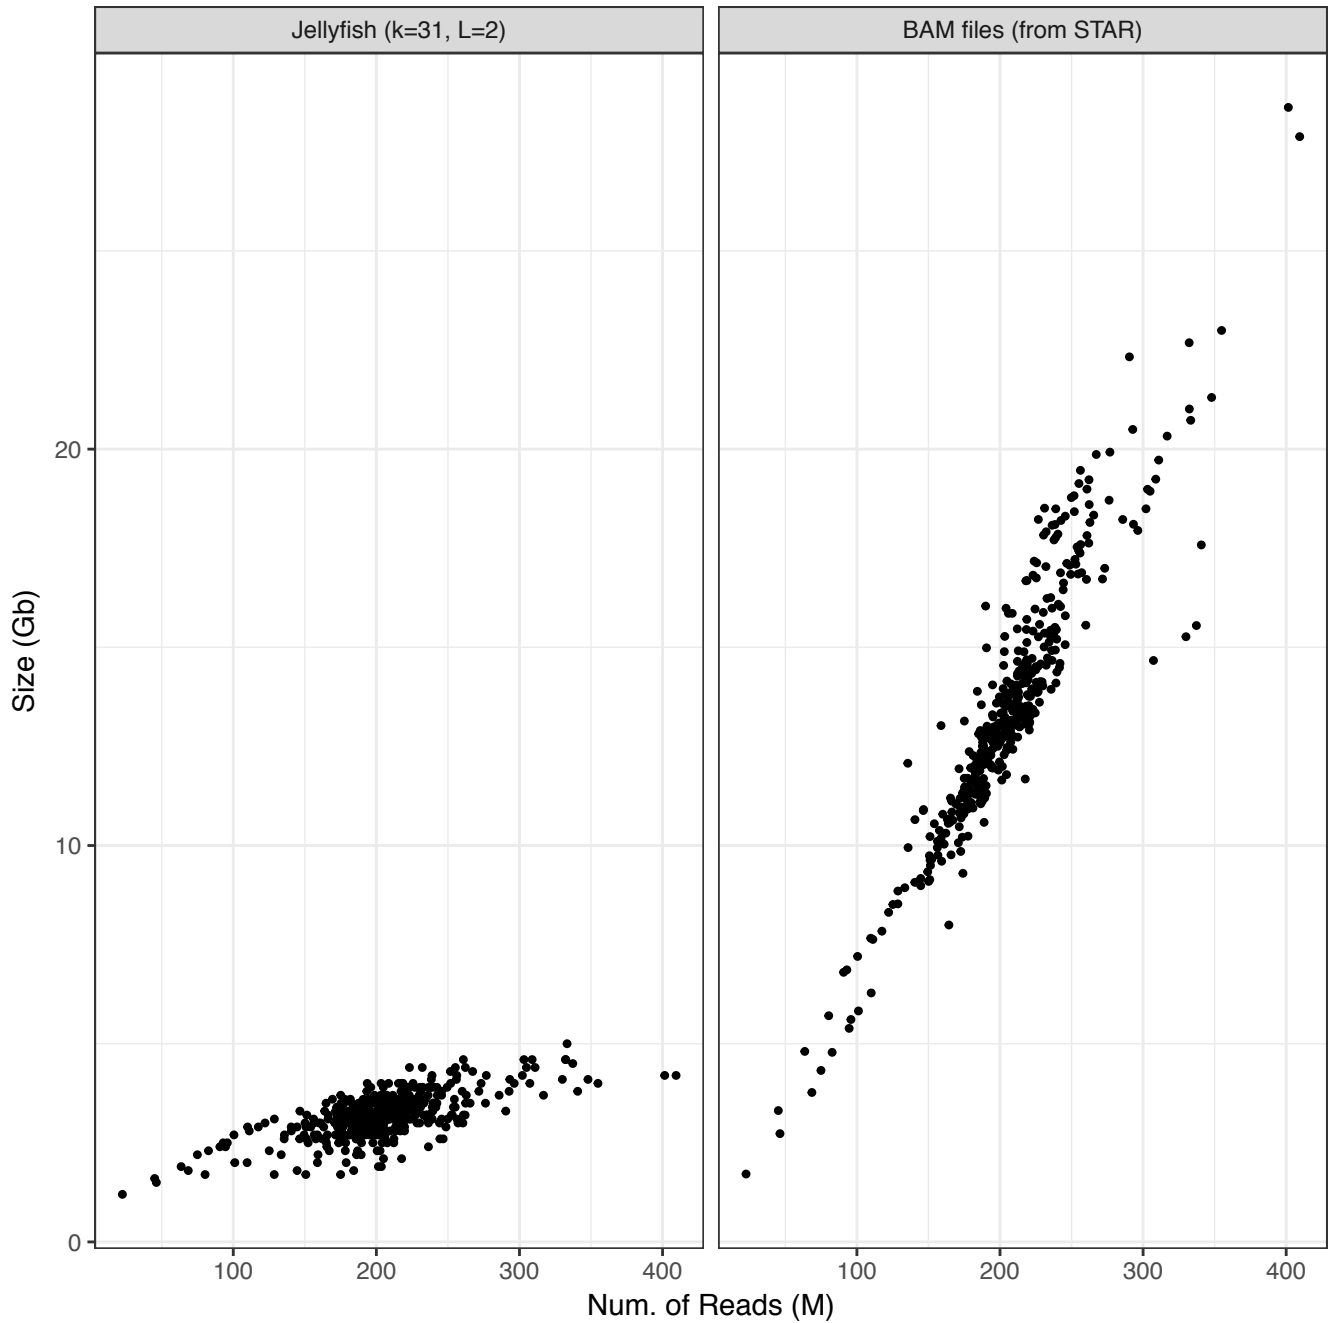

**Supplementary figure 1:** Comparison of k-mer count tables and BAM files size. K-mer count tables are created by Jellyfish, with  $k = 31$  bp and minimum k-mer count of 2. BAM files are produced following a STAR alignment.

Percentage of transcriptome's sequences linearly decomposable  
in function to k-mer length

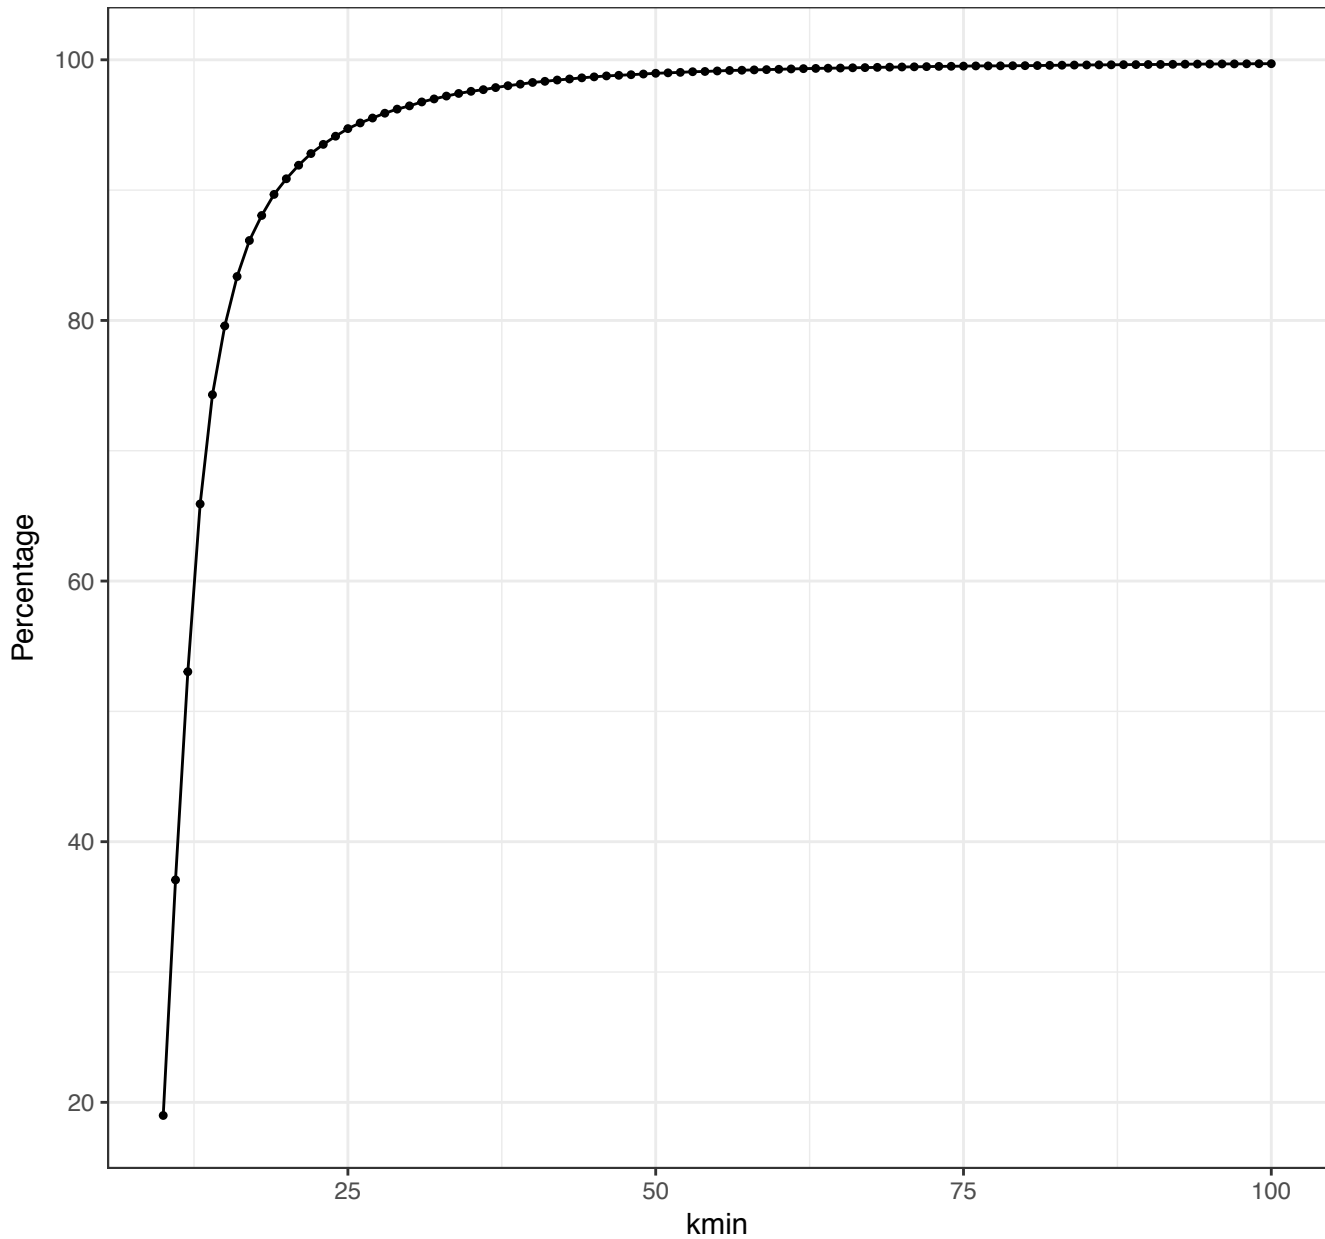

**Supplementary figure 2:** Percentage of transcriptome sequences from Ensembl annotation (GRCh38.82) that can be represented by a linear directed graph. At  $k = 31$  bp, 96.76% of the transcriptome can be used as a target sequence. The transcript requiring the largest  $k$  to achieve a linear representation is ENST00000621744\_NBPF19 and would require  $k = 3,472$  bp.

|            | Tumour | Km | GDC portal |
|------------|--------|----|------------|
| R132C: g/A | AML    | 8  | 9          |
|            | BLCA   | 1  | 1          |
|            | BRCA   | 1  | 1          |
|            | CHOL   | 3  | 4          |
|            | COAD   | 2  | 1          |
|            | GBM    | 0  | 1          |
|            | LGG    | 11 | 17         |
|            | LIHC   | 2  | 2          |
|            | LUAD   | 1  | 1          |
|            | PCPG   | 0  | 1          |
|            | PRAD   | 1  | 2          |
|            | SARC   | 1  | 1          |
|            | SKCM   | 12 | 15         |
|            | THYM   | 1  | 1          |

|            | Tumour | Km  | GDC portal |
|------------|--------|-----|------------|
| R132H: c/T | AML    | 2   | 4          |
|            | BLCA   | 1   | 1          |
|            | BRCA   | 1   | 1          |
|            | CHOL   | 0   | 0          |
|            | COAD   | 0   | 0          |
|            | GBM    | 8   | 23         |
|            | LGG    | 317 | 358        |
|            | LIHC   | 0   | 0          |
|            | LUAD   | 0   | 0          |
|            | PCPG   | 0   | 0          |
|            | PRAD   | 1   | 1          |
|            | SARC   | 0   | 0          |
|            | SKCM   | 0   | 0          |
|            | THYM   | 0   | 0          |

|            | Tumour | Km | GDC portal |
|------------|--------|----|------------|
| R132G: g/C | AML    | 1  | 0          |
|            | BLCA   | 0  | 0          |
|            | BRCA   | 0  | 0          |
|            | CHOL   | 0  | 0          |
|            | COAD   | 1  | 1          |
|            | GBM    | 2  | 1          |
|            | LGG    | 13 | 10         |
|            | LIHC   | 1  | 1          |
|            | LUAD   | 0  | 0          |
|            | PCPG   | 0  | 0          |
|            | PRAD   | 1  | 1          |
|            | SARC   | 0  | 0          |
|            | SKCM   | 0  | 0          |
|            | THYM   | 0  | 0          |

|            | Tumour | Km | GDC portal |
|------------|--------|----|------------|
| R132L: c/A | AML    | 0  | 0          |
|            | BLCA   | 0  | 0          |
|            | BRCA   | 0  | 0          |
|            | CHOL   | 0  | 0          |
|            | COAD   | 0  | 0          |
|            | GBM    | 0  | 0          |
|            | LGG    | 0  | 0          |
|            | LIHC   | 0  | 0          |
|            | LUAD   | 1  | 1          |
|            | PCPG   | 0  | 0          |
|            | PRAD   | 0  | 0          |
|            | SARC   | 0  | 0          |
|            | SKCM   | 2  | 2          |
|            | THYM   | 0  | 0          |

|            | Tumour | Km | GDC portal |
|------------|--------|----|------------|
| R132S: g/T | AML    | 0  | 0          |
|            | BLCA   | 0  | 0          |
|            | BRCA   | 0  | 0          |
|            | CHOL   | 1  | 1          |
|            | COAD   | 0  | 0          |
|            | GBM    | 0  | 0          |
|            | LGG    | 8  | 9          |
|            | LIHC   | 0  | 0          |
|            | LUAD   | 0  | 0          |
|            | PCPG   | 0  | 0          |
|            | PRAD   | 0  | 0          |
|            | SARC   | 0  | 0          |
|            | SKCM   | 0  | 0          |
|            | THYM   | 0  | 0          |

**Supplementary table 1:** Number of TCGA samples with a mutation on amino acid 132 of IDH1, found by *km* compared to data available on the GDC portal. Variant calling on the GDC portal is done in-silico on Exome sequencing, which can explain the small differences with *km*'s results.

| NPM1 |          | Leucegene |          |
|------|----------|-----------|----------|
|      |          | positive  | negative |
| km   | positive | 117       | 0        |
|      | negative | 1         | 85       |

| FLT3-ITD |          | Leucegene |          |
|----------|----------|-----------|----------|
|          |          | positive  | negative |
| km       | positive | 101       | 0        |
|          | negative | 0         | 259      |

| NPM1 |          | TCGA(AML) |          |
|------|----------|-----------|----------|
|      |          | positive  | negative |
| km   | positive | 36        | 4        |
|      | negative | 0         | 114      |

| FLT3-ITD |          | TCGA(AML) |          |
|----------|----------|-----------|----------|
|          |          | positive  | negative |
| km       | positive | 31        | 7        |
|          | negative | 2         | 117      |

**Supplementary table 2** Contingency tables on NPM1 insertion and FLT3-ITD, using common samples between km and experimental validations.

| Sample | Length | Type  | km | cBio | ITDassembly | pIndel | Genomon | Sample | Length | Type | km | cBio | ITDassembly | pIndel | Genomon |
|--------|--------|-------|----|------|-------------|--------|---------|--------|--------|------|----|------|-------------|--------|---------|
| 2812   | 51     | -     |    | ✓    | ✓           | ✓      |         | 2918   | 88     | -    |    |      |             | ✓      | ✓       |
| 2823   | 57     | I&I   | ✓  |      | ✓           | ✓      |         | 2918   | 90     | I&I  | ✓  |      |             |        |         |
| 2823   | 72     | ITD   | ✓  |      |             |        |         | 2919   | 93     | ITD  | ✓  |      |             | ✓      | ✓       |
| 2825   | 102    | I&I   | ✓  | ✓    |             | ✓      |         | 2921   | 24     | I&I  | ✓  | ✓    |             |        | ✓       |
| 2830   | 42     | -     |    |      |             |        | ✓       | 2921   | 57     | I&I  | ✓  |      |             |        | ✓       |
| 2830   | 56     | -     |    |      |             | ✓      |         | 2925   | 42     | ITD  | ✓  | ✓    | ✓           | ✓      | ✓       |
| 2830   | 69     | I&I   | ✓  | ✓    | ✓           |        |         | 2930   | 42     | I&I  | ✓  | ✓    |             |        | ✓       |
| 2836   | 33     | ITD   | ✓  | ✓    | ✓           |        |         | 2931   | 70     | -    |    |      |             | ✓      |         |
| 2840   | 18     | ITD   | ✓  | ✓    | ✓           |        |         | 2931   | 75     | I&I  | ✓  | ✓    |             |        |         |
| 2840   | 105    | Indel | ✓  |      |             |        |         | 2934   | 56     | -    |    |      |             | ✓      |         |
| 2844   | 87     | I&I   | ✓  | ✓    |             | ✓      |         | 2934   | 57     | I&I  | ✓  | ✓    | ✓           |        | ✓       |
| 2853   | 18     | ITD   | ✓  | ✓    | ✓           |        |         | 2942   | 24     | ITD  | ✓  | ✓    | ✓           |        | ✓       |
| 2853   | 105    | Indel | ✓  |      |             |        |         | 2949   | 39     | I&I  | ✓  |      | ✓           |        |         |
| 2856   | 22     | Indel | ✓  |      |             |        |         | 2959   | 118    | -    |    |      |             | ✓      |         |
| 2862   | 69     | -     |    |      |             | ✓      | ✓       | 2959   | 132    | I&I  | ✓  |      |             |        |         |
| 2863   | 105    | Indel | ✓  |      |             |        |         | 2965   | 72     | I&I  | ✓  | ✓    |             |        |         |
| 2869   | 54     | ITD   | ✓  | ✓    | ✓           |        | ✓       | 2970   | 57     | I&I  | ✓  | ✓    |             |        |         |
| 2870   | 12     | Indel | ✓  | ✓    |             |        |         | 2976   | 18     | I&I  | ✓  |      |             |        |         |
| 2871   | 63     | ITD   | ✓  | ✓    |             |        |         | 2976   | 24     | I&I  | ✓  | ✓    |             |        |         |
| 2875   | 30     | I&I   | ✓  | ✓    | ✓           |        | ✓       | 2980   | 21     | ITD  | ✓  | ✓    |             |        |         |
| 2877   | 18     | ITD   | ✓  | ✓    | ✓           |        | ✓       | 2980   | 57     | ITD  | ✓  |      |             |        |         |
| 2880   | 21     | ITD   | ✓  | ✓    | ✓           |        | ✓       | 2981   | 54     | I&I  | ✓  | ✓    |             |        |         |
| 2895   | 45     | ITD   | ✓  | ✓    | ✓           | ✓      | ✓       | 2986   | 48     | ITD  | ✓  | ✓    |             |        |         |
| 2895   | 50     | -     |    |      |             | ✓      |         | 2988   | 36     | -    |    | ✓    |             |        |         |
| 2895   | 51     | I&I   | ✓  |      | ✓           |        |         | 2994   | 21     | ITD  | ✓  | ✓    |             |        |         |
| 2896   | 63     | ITD   | ✓  |      |             |        |         | 2998   | 21     | -    |    | ✓    |             |        |         |
| 2896   | 153    | -     |    |      |             | ✓      | ✓       | 2998   | 51     | ITD  | ✓  |      |             |        |         |
| 2913   | 66     | ITD   | ✓  | ✓    |             | ✓      | ✓       | 3007   | 21     | -    |    | ✓    |             |        |         |
| 2915   | 49     | -     |    |      |             | ✓      |         | 3007   | 24     | ITD  | ✓  |      |             |        |         |
| 2915   | 51     | I&I   | ✓  | ✓    | ✓           |        | ✓       | 3007   | 57     | ITD  | ✓  |      |             |        |         |

**Supplementary table 3:** Summary of all variants found by km, ITDAssembler, Pindel and Genomon ITDetector on 28 TCGA AML samples for which exome and RNA sequencing were available.
